# Supplementary material
Source: Springer Nature journal article supplement (https://www.springermedizin.de/resource/supplementary/12947_2008_234_MOESM1_ESM.pdf/9556512)

**inappropriate**

13%

**uncertain**

22%

**appropriate**

65%

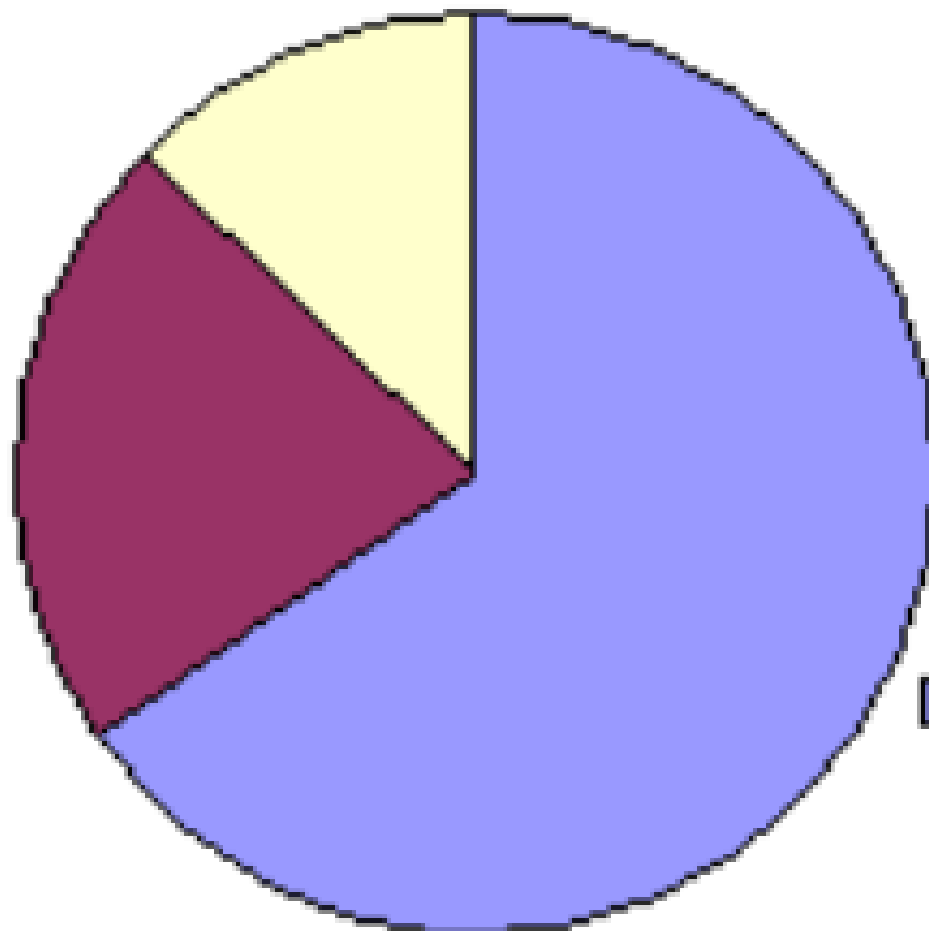

Supplement: MOESM1 [file 9556512]
